# Supplementary material for: Sex hormones, obesity, and risk of cholecystectomy in men and women: a population-based prospective study and mediation analysis
Source: bioRxiv or medRxiv preprint supplement (doi:10.1101/2024.02.19.24303068), 2024-02-20
Supplement: Supplementary file [file media-1.pdf]

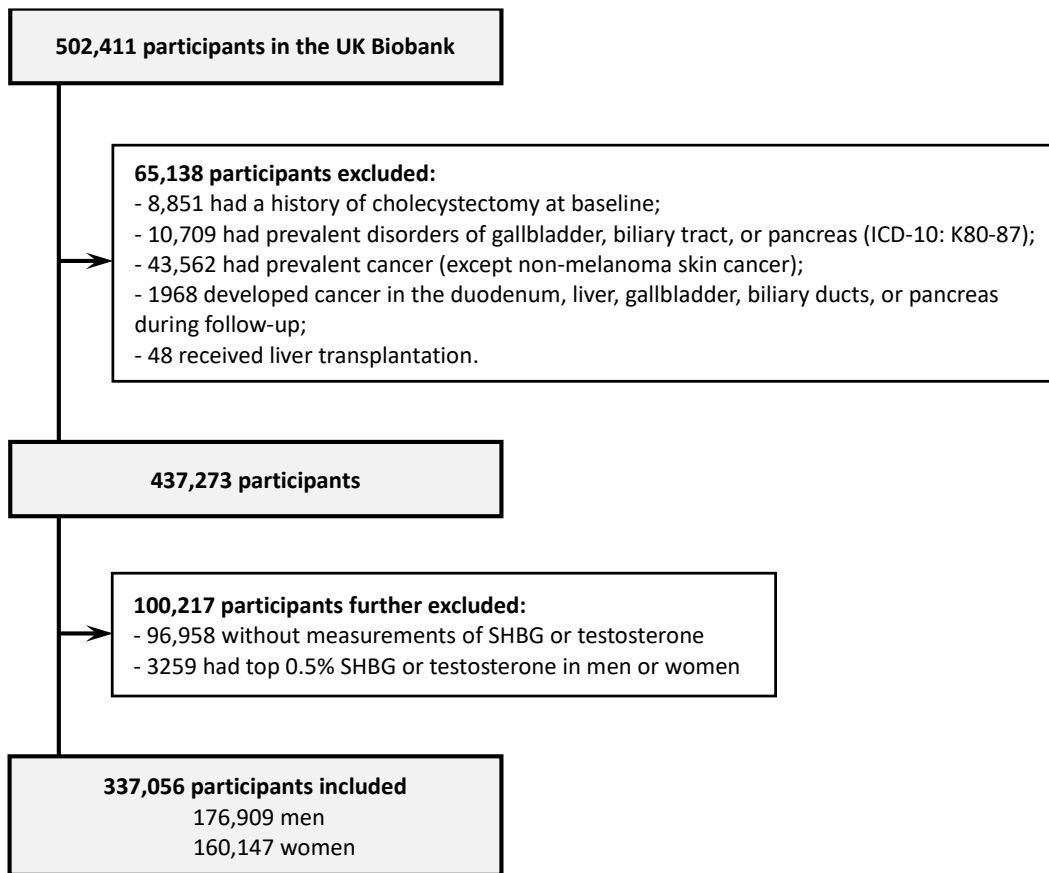

**Supplementary Figure 1. Participant selection.**

| <b>Men</b>   |       |       |       |       |
|--------------|-------|-------|-------|-------|
| SHBG         | 1.00  | 0.57  | 0.29  | -0.31 |
| Testosterone | 0.57  | 1.00  | -0.06 | -0.30 |
| Age          | 0.29  | -0.06 | 1.00  | 0.03  |
| BMI          | -0.31 | -0.30 | 0.03  | 1.00  |

  

| <b>Women</b> |       |       |       |       |
|--------------|-------|-------|-------|-------|
| SHBG         | 1.00  | -0.02 | -0.07 | -0.47 |
| Testosterone | -0.02 | 1.00  | -0.14 | 0.08  |
| Age          | -0.07 | -0.14 | 1.00  | 0.10  |
| BMI          | -0.47 | 0.08  | 0.10  | 1.00  |

SHBG    Testosterone    Age    BMI

**Supplementary Figure 2. Spearman correlation among SHBG, testosterone, age, and BMI.**
